# Supplementary material
Source: PubMed Central journal article supplement (PMC5437909)
Supplement: ejhg20173x1.pdf [file ejhg20173x1.pdf]

Table S1: QPCR primer sequences

| Primer name | Sequence (5'-3')      | QPCR size (bp) |
|-------------|-----------------------|----------------|
| KCNC1-hs5F  | CTCAGAGTGACACATGTCCG  | 123            |
| KCNC1-hs5R  | GGTCTATGTGGGGGCAGTCT  |                |
| hUBCVF      | ATTTGGGTCGCGGTTCTTG   | 133            |
| hUBCVR      | TGCCTTGACATTCTCGATGGT |                |
